# Supplementary material for: Heat and drought induced transcriptomic changes in barley varieties with contrasting stress response phenotypes
Source: Front Plant Sci. 2022 Dec 8;13:1066421. doi: 10.3389/fpls.2022.1066421 (PMC9772561; doi:10.3389/fpls.2022.1066421)
Supplement: Supplementary file 8 [file Table_1.xlsx]

## Sheet: New Alignment Statistics
Supplementary Table 1. Alignment metrics for the RNA-seq libraries from Golden Promise and Otis subjected to heat and drought stress
Sample	File Name	Input reads	Cleaned	Cleaned (%)	Aligned	Aligned (%)	Uniquelymapped	Uniquely mapped (%)	Multi mapped	Multi mapped (%)		Sample	File Name	Input reads	Cleaned	Cleaned (%)	Aligned	Aligned (%)	Uniquely mapped	Uniquely mapped (%)	Multi mapped	Multi mapped (%)
GP_R1_H-and-D_D1_Flag_S59_L005_R1_001	GA1	3931466	3926748	99.88	3059554	77.92	2939430	96.07	120124	3.93		Otis_R1_H-and-D_D1_Flag_S56_L005_R1_001	OA1	5640010	5638106	99.97	5070139	89.93	4946973	97.57	123166	2.43
GP_R2_H-and-D_D1_Flag_S59_L005_R1_001	GA2	4470312	4468519	99.96	3421515	76.57	3286960	96.07	134555	3.93		Otis_R2_H-and-D_D1_Flag_S3_L006_R1_001	OA2	4389291	4387840	99.97	3308947	75.41	3205690	96.88	103257	3.12
GP_R3_H-and-D_D1_Flag_S60_L006_R1_001	GA3	3992011	3991404	99.98	3445974	86.33	3360968	97.53	85006	2.47		Otis_R3_H-and-D_D1_Flag_S57_L006_R1_001	OA3	4311970	4311386	99.99	3429035	79.53	3340698	97.42	88337	2.58
GP_R1_H-and-D_D1_Head_S67_L005_R1_001	GB1	3508802	3507899	99.97	3270405	93.23	3190896	97.57	79509	2.43		Otis_R1_H-and-D_D1_Head_S64_L005_R1_001	OB1	3424371	3422987	99.96	3055976	89.28	2975799	97.38	80177	2.62
GP_R2_H-and-D_D1_Head_S14_L006_R1_001	GB2	4380051	4378775	99.97	3896909	89	3770196	96.75	126713	3.25		Otis_R2_H-and-D_D1_Head_S11_L006_R1_001	OB2	4075387	4074392	99.98	3536111	86.79	3429309	96.98	106802	3.02
GP_R3_H-and-D_D1_Head_S68_L006_R1_001	GB3	3183231	3182610	99.98	2914379	91.57	2838418	97.39	75961	2.61		Otis_R3_H-and-D_D1_Head_S65_L006_R1_001	OB3	2956924	2956195	99.98	2599432	87.93	2521653	97.01	77779	2.99
GP_R1_H-and-D_D5_Flag_S75_L005_R1_001	GC1	3698911	3694690	99.89	2951022	79.87	2781380	94.25	169642	5.75		Otis_R1_H-and-D_D5_Flag_S72_L005_R1_001	OC1	3623629	3620241	99.91	2997760	82.81	2808837	93.7	188923	6.3
GP_R2_H-and-D_D5_Flag_S22_L006_R1_001	GC2	5379082	5377443	99.97	4270026	79.41	4009197	93.89	260829	6.11		Otis_R2_H-and-D_D5_Flag_S19_L006_R1_001	OC2	3715275	3714522	99.98	2537105	68.3	2463994	97.12	73111	2.88
GP_R3_H-and-D_D5_Flag_S55_L006_R1_001	GC3	3187384	3186703	99.98	2571231	80.69	2442410	94.99	128821	5.01		Otis_R3_H-and-D_D5_Flag_S108_L005_R1_001	OC3	4278349	4277085	99.97	3058723	71.51	2938596	96.07	120127	3.93
GP_R1_H-and-D_D5_Head_S83_L005_R1_001	GD1	3850779	3848977	99.95	3312143	86.05	3142190	94.87	169953	5.13		Otis_R1_H-and-D_D5_Head_S80_L005_R1_001	OD1	3655491	3654032	99.96	3184599	87.15	3063081	96.18	121518	3.82
GP_R2_H-and-D_D5_Head_S30_L006_R1_001	GD2	4574353	4570428	99.91	4045483	88.51	3870122	95.67	175361	4.33		Otis_R2_H-and-D_D5_Head_S27_L006_R1_001	OD2	4269599	4268401	99.97	3738383	87.58	3619146	96.81	119237	3.19
GP_R3_H-and-D_D5_Head_S56_L006_R1_001	GD3	3828052	3827235	99.98	3514287	91.82	3398679	96.71	115608	3.29		Otis_R3_H-and-D_D5_Head_S109_L005_R1_001	OD3	5058471	5056076	99.95	4534357	89.68	4395783	96.94	138574	3.06
GP_R1_H-and-DCon_D1_Flag_S91_L005_R1_001	GE1	4073016	4071095	99.95	2411833	59.24	2288003	94.87	123830	5.13		Otis_R1_H-and-DCon_D1_Flag_S88_L005_R1_001	OE1	2951876	2950621	99.96	1675857	56.8	1604110	95.72	71747	4.28
GP_R2_H-and-DCon_D1_Flag_S38_L006_R1_001	GE2	4892135	4889779	99.95	3431127	70.17	3310919	96.5	120208	3.5		Otis_R2_H-and-DCon_D1_Flag_S35_L006_R1_001	OE2	4091045	4089901	99.97	2761506	67.52	2678966	97.01	82540	2.99
GP_R3_H-and-DCon_D1_Flag_S107_L005_R1_001	GE3	4372997	4371612	99.97	3125202	71.49	3015063	96.48	110139	3.52		Otis_R3_H-and-DCon_D1_Flag_S104_L005_R1_001	OE3	3382691	3381982	99.98	2367323	70	2300975	97.2	66348	2.8
GP_R1_H-and-DCon_D1_Head_S99_L005_R1_001	GF1	3924310	3923590	99.98	3152271	80.34	3005776	95.35	146495	4.65		Otis_R1_H-and-DCon_D1_Head_S96_L005_R1_001	OF1	4489216	4487717	99.97	3785631	84.36	3645518	96.3	140113	3.7
GP_R2_H-and-DCon_D1_Head_S46_L006_R1_001	GF2	4162178	4161552	99.98	3753869	90.2	3649444	97.22	104425	2.78		Otis_R2_H-and-DCon_D1_Head_S43_L006_R1_001	OF2	4144691	4144016	99.98	3530555	85.2	3403607	96.4	126948	3.6
GP_R3_H-and-DCon_D1_Head_S115_L005_R1_001	GF3	3960830	3958514	99.94	3455780	87.3	3322393	96.14	133387	3.86		Otis_R3_H-and-DCon_D1_Head_S112_L005_R1_001	OF3	2850121	2849524	99.98	2505047	87.91	2432019	97.08	73028	2.92
GP_R1_H-and-DCon_D5_Flag_S100_L005_R1_001	GG1	4012635	4011687	99.98	2638856	65.78	2538354	96.19	100502	3.81		Otis_R1_H-and-DCon_D5_Flag_S76_L005_R1_001	OG1	4571643	4570286	99.97	2751115	60.2	2636595	95.84	114520	4.16
GP_R2_H-and-DCon_D5_Flag_S47_L006_R1_001	GG2	3911453	3910648	99.98	2675278	68.41	2577778	96.36	97500	3.64		Otis_R2_H-and-DCon_D5_Flag_S23_L006_R1_001	OG2	4122288	4121565	99.98	2694222	65.37	2610970	96.91	83252	3.09
GP_R3_H-and-DCon_D5_Flag_S123_L005_R1_001	GG3	5807773	5806048	99.97	4195074	72.25	4067220	96.95	127854	3.05		Otis_R3_H-and-DCon_D5_Flag_S120_L005_R1_001	OG3	3109298	3108375	99.97	2249881	72.38	2187285	97.22	62596	2.78
GP_R1_H-and-DCon_D5_Head_S101_L005_R1_001	GH1	4468122	4466262	99.96	3790953	84.88	3649047	96.26	141906	3.74		Otis_R1_H-and-DCon_D5_Head_S77_L005_R1_001	OH1	6301057	6299569	99.98	5511948	87.5	5348790	97.04	163158	2.96
GP_R2_H-and-DCon_D5_Head_S48_L006_R1_001	GH2	4479294	4478372	99.98	4003636	89.4	3891612	97.2	112024	2.8		Otis_R2_H-and-DCon_D5_Head_S24_L006_R1_001	OH2	4607711	4606531	99.97	4037972	87.66	3919667	97.07	118305	2.93
GP_R3_H-and-DCon_D5_Head_S54_L006_R1_001	GH3	3455454	3454907	99.98	2998232	86.78	2901402	96.77	96830	3.23		Otis_R3_H-and-DCon_D5_Head_S51_L006_R1_001	OH3	3329332	3328798	99.98	2931701	88.07	2852199	97.29	79502	2.71
GP_R1_Drought_D1_Flag_S58_L005_R1_001	GI1	4055875	4051151	99.88	2982652	73.62	2895079	97.06	87573	2.94		Otis_R1_Drought_D1_Flag_S2_L006_R1_001	OI1	4760442	4758528	99.96	3473227	72.99	3383940	97.43	89287	2.57
GP_R2_Drought_D1_Flag_S5_L006_R1_001	GI2	5871999	5865710	99.89	3150835	53.72	2955830	93.81	195005	6.19		Otis_R2_Drought_D1_Flag_S2_L006_R1_001	OI2	5487219	5485545	99.97	3710574	67.64	3587839	96.69	122735	3.31
GP_R3_Drought_D1_Flag_S106_L005_R1_001	GI3	3423930	3423004	99.97	2299014	67.16	2220093	96.57	78921	3.43		Otis_R3_Drought_D1_Flag_S103_L005_R1_001	OI3	4125883	4124889	99.98	2774906	67.27	2692712	97.04	82194	2.96
GP_R1_Drought_D1_Head_S66_L005_R1_001	GJ1	3696839	3696607	99.99	3041733	82.28	2902739	95.43	138994	4.57		Otis_R1_Drought_D1_Head_S63_L005_R1_001	OJ1	3773070	3772121	99.97	3275288	86.83	3182147	97.16	93141	2.84
GP_R2_Drought_D1_Head_S13_L006_R1_001	GJ2	3545637	3544881	99.98	3164053	89.26	3065813	96.9	98240	3.1		Otis_R2_Drought_D1_Head_S10_L006_R1_001	OJ2	4059060	4058199	99.98	3494369	86.11	3375777	96.61	118592	3.39
GP_R3_Drought_D1_Head_S114_L005_R1_001	GJ3	3418915	3418466	99.99	3031384	88.68	2938985	96.95	92399	3.05		Otis_R3_Drought_D1_Head_S111_L005_R1_001	OJ3	4303695	4303180	99.99	3783130	87.91	3676548	97.18	106582	2.82
GP_R1_Drought_D5_Flag_S74_L005_R1_001	GK1	4383388	4381917	99.97	3924754	89.57	3824965	97.46	99789	2.54		Otis_R1_Drought_D5_Flag_S71_L005_R1_001	OK1	3552052	3551561	99.99	3143655	88.51	3078689	97.93	64966	2.07
GP_R2_Drought_D5_Flag_S21_L006_R1_001	GK2	4357336	4355539	99.96	3136333	72.01	3012073	96.04	124260	3.96		Otis_R2_Drought_D5_Flag_S18_L006_R1_001	OK2	5076311	5075294	99.98	3954382	77.91	3845857	97.26	108525	2.74
GP_R3_Drought_D5_Flag_S122_L005_R1_001	GK3	3922937	3922282	99.98	3329826	84.9	3238959	97.27	90867	2.73		Otis_R3_Drought_D5_Flag_S119_L005_R1_001	OK3	3508866	3508282	99.98	2886868	82.29	2821089	97.72	65779	2.28
GP_R1_Drought_D5_Head_S82_L005_R1_001	GL1	3576426	3574557	99.95	3070869	85.91	2935543	95.59	135326	4.41		Otis_R1_Drought_D5_Head_S79_L005_R1_001	OL1	4151740	4148981	99.93	3491140	84.14	3345324	95.82	145816	4.18
GP_R2_Drought_D5_Head_S29_L006_R1_001	GL2	3419084	3417695	99.96	3028072	88.6	2926760	96.65	101312	3.35		Otis_R2_Drought_D5_Head_S26_L006_R1_001	OL2	4143506	4142483	99.98	3755415	90.66	3614816	96.26	140599	3.74
GP_R3_Drought_D5_Head_S53_L006_R1_001	GL3	3398498	3397904	99.98	3104164	91.36	3018157	97.23	86007	2.77		Otis_R3_Drought_D5_Head_S50_L006_R1_001	OL3	4975208	4972908	99.95	4421754	88.92	4265376	96.46	156378	3.54
GP_R1_DroughtCon_D1_Flag_S90_L005_R1_001	GM1	3744072	3742505	99.96	2276430	60.83	2173911	95.5	102519	4.5		Otis_R1_DroughtCon_D1_Flag_S87_L005_R1_001	OM1	2818970	2817694	99.95	1715910	60.9	1647346	96	68564	4
GP_R2_DroughtCon_D1_Flag_S37_L006_R1_001	GM2	3975733	3974953	99.98	2599151	65.39	2511041	96.61	88110	3.39		Otis_R2_DroughtCon_D1_Flag_S34_L006_R1_001	OM2	3983604	3982275	99.97	2752936	69.13	2667975	96.91	84961	3.09
GP_R3_DroughtCon_D1_Flag_S62_L006_R1_001	GM3	3101763	3101048	99.98	2206299	71.15	2140239	97.01	66060	2.99		Otis_R3_DrtCon_D1_Flag_S59_L006_R1_001	OM3	3234705	3234120	99.98	2220810	68.67	2154039	96.99	66771	3.01
GP_R1_DroughtCon_D1_Head_S98_L005_R1_001	GN1	4798180	4795588	99.95	3953680	82.44	3755937	95	197743	5		Otis_R1_DroughtCon_D1_Head_S95_L005_R1_001	ON1	4418409	4417167	99.97	3553874	80.46	3385775	95.27	168099	4.73
GP_R2_DroughtCon_D1_Head_S45_L006_R1_001	GN2	4123558	4122810	99.98	3627517	87.99	3506765	96.67	120752	3.33		Otis_R2_DroughtCon_D1_Head_S42_L006_R1_001	ON2	4616109	4615520	99.99	4056904	87.9	3944675	97.23	112229	2.77
GP_R3_DroughtCon_D1_Head_S70_L006_R1_001	GN3	3942219	3941188	99.97	3477791	88.24	3364450	96.74	113341	3.26		Otis_R3_DrtCon_D1_Head_S67_L006_R1_001	ON3	3419672	3418801	99.97	2900532	84.84	2804877	96.7	95655	3.3
GP_R1_DroughtCon_D5_Flag_S92_L005_R1_001	GO1	4097234	4096725	99.99	3301557	80.59	3208641	97.19	92916	2.81		Otis_R1_DroughtCon_D5_Flag_S68_L005_R1_001	OO1	3928459	3926052	99.94	3029099	77.15	2949747	97.38	79352	2.62
GP_R2_DroughtCon_D5_Flag_S39_L006_R1_001	GO2	4601809	4600688	99.98	3121307	67.84	3014504	96.58	106803	3.42		Otis_R2_DroughtCon_D5_Flag_S15_L006_R1_001	OO2	3682762	3681778	99.97	2329534	63.27	2249462	96.56	80072	3.44
GP_R3_DroughtCon_D5_Flag_S71_L006_R1_001	GO3	3357421	3356753	99.98	2526265	75.26	2448933	96.94	77332	3.06		Otis_R3_DrtCon_D5_Flag_S124_L005_R1_001	OO3	3986051	3985402	99.98	2746018	68.9	2668811	97.19	77207	2.81
GP_R1_DroughtCon_D5_Head_S93_L005_R1_001	GP1	5071449	5070032	99.97	4337388	85.55	4174140	96.24	163248	3.76		Otis_R1_DroughtCon_D5_Head_S69_L005_R1_001	OP1	5648095	5646086	99.96	4971476	88.05	4813056	96.81	158420	3.19
GP_R2_DroughtCon_D5_Head_S40_L006_R1_001	GP2	4861904	4860889	99.98	4247516	87.38	4093096	96.36	154420	3.64		Otis_R2_DroughtCon_D5_Head_S16_L006_R1_001	OP2	4919063	4917986	99.98	4240693	86.23	4108949	96.89	131744	3.11
GP_R3_DroughtCon_D5_Head_S72_L006_R1_001	GP3	3265051	3264391	99.98	2890713	88.55	2799054	96.83	91659	3.17		Otis_R3_DrtCon_D5_Head_S125_L005_R1_001	OP3	5021536	5021000	99.99	4465395	88.93	4348706	97.39	116689	2.61
GP_R1_Heat_D1_Flag_S57_L005_R1_001	GQ1	3821572	3813500	99.79	2955034	77.49	2869472	97.1	85562	2.9		Otis_R1_Heat_D1_Flag_S54_L005_R1_001	OQ1	3914270	3912147	99.95	2800508	71.58	2718050	97.06	82458	2.94
GP_R2_Heat_D1_Flag_S4_L006_R1_001	GQ2	3811979	3809958	99.95	2499330	65.6	2404316	96.2	95014	3.8		Otis_R2_Heat_D1_Flag_S1_L006_R1_001	OQ2	5077562	5071443	99.88	3280197	64.68	3132444	95.5	147753	4.5
GP_R3_Heat_D1_Flag_S105_L005_R1_001	GQ3	4927479	4925823	99.97	3703033	75.18	3596137	97.11	106896	2.89		Otis_R3_Heat_D1_Flag_S102_L005_R1_001	OQ3	4296269	4295425	99.98	3064147	71.34	2982273	97.33	81874	2.67
GP_R1_Heat_D1_Head_S65_L005_R1_001	GR1	3527122	3526197	99.97	3158152	89.56	3071422	97.25	86730	2.75		Otis_R1_Heat_D1_Head_S62_L005_R1_001	OR1	3314311	3313419	99.97	2969100	89.61	2888580	97.29	80520	2.71
GP_R2_Heat_D1_Head_S12_L006_R1_001	GR2	4790520	4789544	99.98	4100271	85.61	3952624	96.4	147647	3.6		Otis_R2_Heat_D1_Head_S9_L006_R1_001	OR2	4649632	4647861	99.96	4062145	87.4	3927000	96.67	135145	3.33
GP_R3_Heat_D1_Head_S113_L005_R1_001	GR3	3674520	3673934	99.98	3237937	88.13	3140156	96.98	97781	3.02		Otis_R3_Heat_D1_Head_S110_L005_R1_001	OR3	4779811	4778926	99.98	4212591	88.15	4093129	97.16	119462	2.84
GP_R1_Heat_D5_Flag_S73_L005_R1_001	GS1	4011688	4009816	99.95	2373832	59.2	2256538	95.06	117294	4.94		Otis_R1_Heat_D5_Flag_S70_L005_R1_001	OS1	4449030	4446298	99.94	3308298	74.41	3204876	96.87	103422	3.13
GP_R2_Heat_D5_Flag_S20_L006_R1_001	GS2	3881753	3880868	99.98	2406846	62.02	2308874	95.93	97972	4.07		Otis_R2_Heat_D5_Flag_S17_L006_R1_001	OS2	4643493	4642844	99.99	3119572	67.19	3021031	96.84	98541	3.16
GP_R3_Heat_D5_Flag_S121_L005_R1_001	GS3	3323406	3322835	99.98	2304433	69.35	2229116	96.73	75317	3.27		Otis_R3_Heat_D5_Flag_S118_L005_R1_001	OS3	4486168	4485440	99.98	2941177	65.57	2850561	96.92	90616	3.08
GP_R1_Heat_D5_Head_S81_L005_R1_001	GT1	4081701	4079248	99.94	3392234	83.16	3233791	95.33	158443	4.67		Otis_R1_Heat_D5_Head_S78_L005_R1_001	OT1	4424494	4422201	99.95	3622094	81.91	3473931	95.91	148163	4.09
GP_R2_Heat_D5_Head_S28_L006_R1_001	GT2	3643166	3642489	99.98	3233199	88.76	3138238	97.06	94961	2.94		Otis_R2_Heat_D5_Head_S49_L006_R1_001	OT2	4274247	4271251	99.93	3580646	83.83	3373188	94.21	207458	5.79
GP_R3_Heat_D5_Head_S52_L006_R1_001	GT3	3868058	3867196	99.98	3451801	89.26	3351269	97.09	100532	2.91		Otis_R3_Heat_D5_Head_S49_L006_R1_001	OT3	2711363	2710744	99.98	2374389	87.59	2304946	97.08	69443	2.92
GP_R1_HeatCon_D1_Flag_S89_L005_R1_001	GU1	4329255	4328088	99.97	2755589	63.67	2644659	95.97	110930	4.03		Otis_R1_HeatCon_D1_Flag_S86_L005_R1_001	OU1	3302688	3301657	99.97	2025944	61.36	1941912	95.85	84032	4.15
GP_R2_HeatCon_D1_Flag_S36_L006_R1_001	GU2	4330352	4328997	99.97	3053189	70.53	2950587	96.64	102602	3.36		Otis_R2_HeatCon_D1_Flag_S33_L006_R1_001	OU2	4680098	4678317	99.96	3292056	70.37	3184877	96.74	107179	3.26
GP_R3_HeatCon_D1_Flag_S61_L006_R1_001	GU3	3650575	3649952	99.98	2638302	72.28	2556798	96.91	81504	3.09		Otis_R3_HeatCon_D1_Flag_S58_L006_R1_001	OU3	3402346	3401870	99.99	2337822	68.72	2273539	97.25	64283	2.75
GP_R1_HeatCon_D1_Head_S97_L005_R1_001	GV1	5246804	5244991	99.97	4396372	83.82	4178808	95.05	217564	4.95		Otis_R1_HeatCon_D1_Head_S94_L005_R1_001	OV1	4798184	4797095	99.98	3981737	83	3822183	95.99	159554	4.01
GP_R2_HeatCon_D1_Head_S44_L006_R1_001	GV2	4271587	4270559	99.98	3728010	87.3	3603190	96.65	124820	3.35		Otis_R2_HeatCon_D1_Head_S41_L006_R1_001	OV2	4997513	4996771	99.99	4319355	86.44	4190608	97.02	128747	2.98
GP_R3_HeatCon_D1_Head_S69_L006_R1_001	GV3	3220561	3219840	99.98	2823572	87.69	2727368	96.59	96204	3.41		Otis_R3_HeatCon_D1_Head_S66_L006_R1_001	OV3	4563424	4558695	99.9	3876125	85.03	3740152	96.49	135973	3.51
GP_R1_HeatCon_D5_Flag_S84_L005_R1_001	GW1	4176063	4175058	99.98	2556113	61.22	2439718	95.45	116395	4.55		Otis_R1_HeatCon_D5_Flag_S60_L005_R1_001	OW1	3223988	3222900	99.97	1921479	59.62	1839855	95.75	81624	4.25
GP_R2_HeatCon_D5_Flag_S31_L006_R1_001	GW2	4452014	4450827	99.97	2941058	66.08	2826736	96.11	114322	3.89		Otis_R2_HeatCon_D5_Flag_S7_L006_R1_001	OW2	4716593	4715131	99.97	3127411	66.33	3019228	96.54	108183	3.46
GP_R3_HeatCon_D5_Flag_S63_L006_R1_001	GW3	3479006	3478470	99.98	2587246	74.38	2508079	96.94	79167	3.06		Otis_R3_HeatCon_D5_Flag_S116_L005_R1_001	OW3	4181434	4180655	99.98	2786714	66.66	2701258	96.93	85456	3.07
GP_R1_HeatCon_D5_Head_S85_L005_R1_001	GX1	4835817	4834958	99.98	4082892	84.45	3933670	96.35	149222	3.65		Otis_R1_HeatCon_D5_Head_S61_L005_R1_001	OX1	3677886	3676870	99.97	3180422	86.5	3084576	96.99	95846	3.01
GP_R2_HeatCon_D5_Head_S64_L006_R1_001	GX2	4473538	4471107	99.95	3984716	89.12	3853166	96.7	131550	3.3		Otis_R2_HeatCon_D5_Head_S8_L006_R1_001	OX2	4613937	4612762	99.97	4067278	88.17	3951828	97.16	115450	2.84
GP_R3_HeatCon_D5_Head_S64_L006_R1_001	GX3	3424864	3424016	99.98	3027541	88.42	2938776	97.07	88765	2.93		Otis_R3_HeatCon_D5_Head_S117_L005_R1_001	OX3	4552631	4551992	99.99	4007341	88.03	3901270	97.35	106071	2.65
	Avg	4.06624e+06	4.06474e+06	99.9636	3.21563e+06	79.4135	3.09843e+06	96.3521	117194	3.64792			Avg	4.17605e+06	4.1747e+06	99.9683	3.29527e+06	78.5829	3.1884e+06	96.735	106870	3.265
	Max	5871999	5865710	99.99	4396372	93.23	4178808	97.57	260829	6.19			Max	6301057	6299569	99.99	5511948	90.66	5348790	97.93	207458	6.3
	Min	3101763	3101048	99.79	2206299	53.72	2140239	93.81	66060	2.43			Min	2711363	2710744	99.88	1675857	56.8	1604110	93.7	62596	2.07
	Total	292769288	292661051		231525044		223087072		8437972				Total	300675595	300578714		237259762		229565087		7694675
